# Supplementary material for: Phase II Trial of Combined Durvalumab Plus Tremelimumab with Proton Therapy for Recurrent or Metastatic Head and Neck Squamous Cell Carcinoma
Source: PubMed Central journal article supplement — Cancer Res Treat. 2023 May 17;55(4):1104–12. doi: 10.4143/crt.2023.502 (PMC10582547; doi:10.4143/crt.2023.502), 2023-05-17
Supplement: crt-2023-502_S1_Fig.pdf [file crt-2023-502_S1_Fig.pdf]

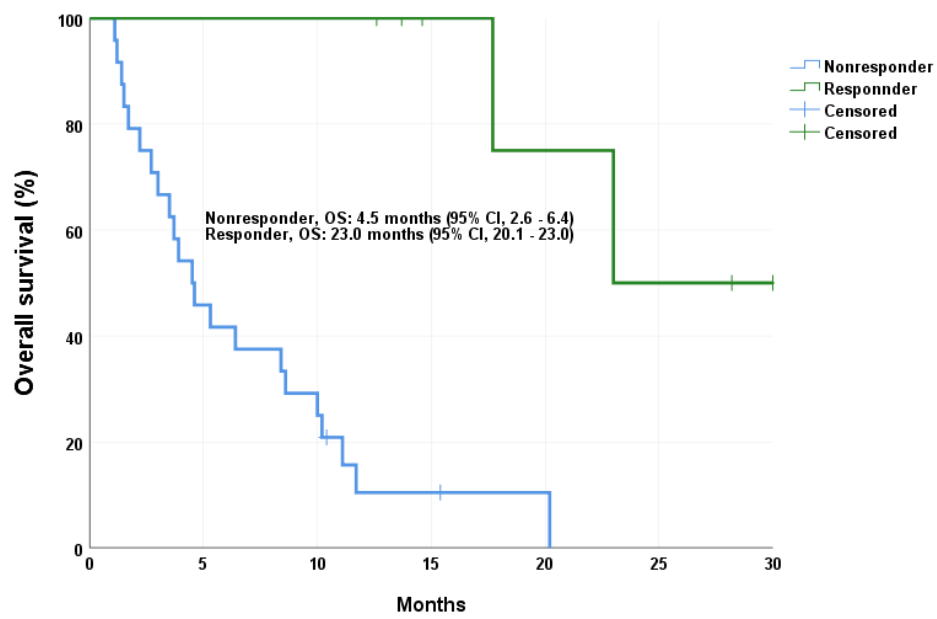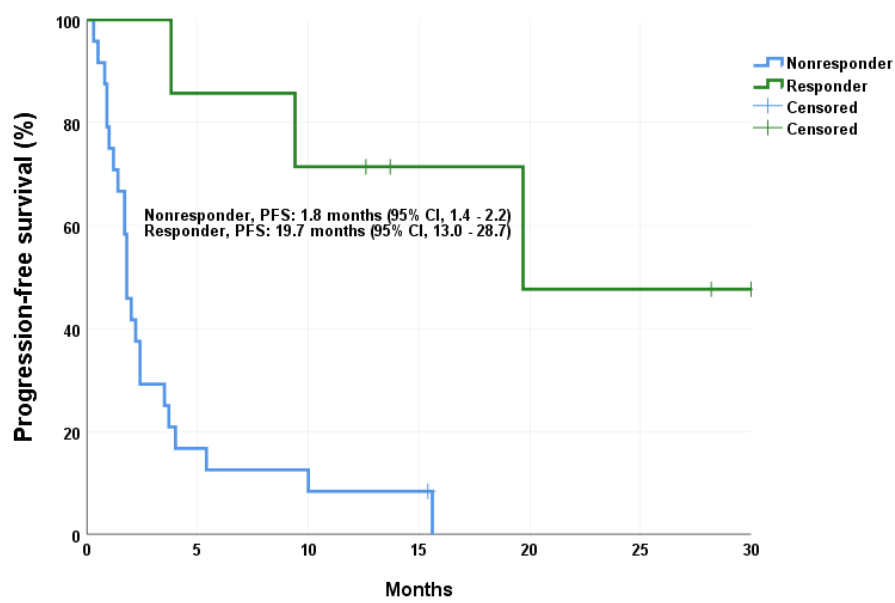

**S1 Fig.** Overall survival (OS) and progression-free survival (PFS) According to the Responder vs. Non-responder.
